# Supplementary material for: The European Union Radiological Data Exchange Platform (EURDEP): 25 years of monitoring data exchange
Source: Copernicus journal article supplement (doi:10.5194/essd-2019-132), 2019-09-16
Supplement: Supplementary file [file essd-2019-132-RC2-supplement.pdf]

Overall, an easy to read manuscript with data that is important for early warning systems for radiologic hazards. Just a couple of comments, mostly to improve the reader experience.

#### Abstract

Line 10: Condense this sentence to improve its readability. It starts the manuscript off in a convoluted manner.

#### Introduction

Page 2 Line 4-6: Can you explain specifically what experience was gained, or was it more of a realization that we were inadequately prepared, resulting in the need to improve the approach to this type of disaster? Was the experience simply the first time a nuclear disaster had occurred?

Line 31: Some explanation of why the Fukushima accident demonstrates the need for relevant air concentration measurements would better inform the reader.

#### EURDEP Networks

##### Page 4

Line 18: See above comment about Fukushima

Line 27: Although this manuscript is written for primarily European use, I believe the abbreviations should be defined somewhere, or referred to in a supplement/citation.

#### Data availability for 2017 106RU detection across Europe

Line 29-30: Any explanation of why this occurred?
